# Supplementary material for: Allosteric regulation of the lid domain of PCK2 as a novel strategy for modulating mitochondrial dynamics
Source: Royal Society of Chemistry journal article supplement (doi:10.1039/d3cc02781c), 2023-01-01
Supplement: d3cc02781c2.xlsx [file d3cc02781c2.xlsx]

## Sheet: Proteins
Checked	Master	Accession	Description	Coverage [%]	# Peptides	# PSMs	# Unique Peptides	# AAs	MW [kDa]	calc. pI	Score Sequest HT: Sequest HT	# Peptides (by Search Engine): Sequest HT	# Protein Groups
FALSE	Master Protein	A0A384MTT2	Phosphoenolpyruvate carboxykinase (GTP) OS=Homo sapiens OX=9606 GN=PCK2 PE=2 SV=1	72	52	434	49	640	70.7	7.62	1323.14	52	1
	Checked	Confidence	Sequence	Modifications	Qvality PEP	Qvality q-value	# Protein Groups	# Proteins	# PSMs	Master Protein Accessions	# Missed Cleavages	Theo. MH+ [Da]	Confidence (by Search Engine): Sequest HT	Percolator q-Value (by Search Engine): Sequest HT	Percolator PEP (by Search Engine): Sequest HT	XCorr (by Search Engine): Sequest HT
	FALSE	High	AIDTTQLFSLPK		0.0141223	0.0080834	1	5	2	A0A384MTT2	0	1333.74	High	0.002101	0.006151	2.77
	FALSE	High	AIDTTQLFSLPKDFWEQEVR		2.77673e-05	0.0080834	1	5	2	A0A384MTT2	1	2423.22	High	0.002101	1.234e-05	7.15
	FALSE	High	CLHSVGQPLTGQGEPVSQWPCNPEK	2xCarbamidomethyl [C1; C21]	3.05388e-05	0.0080834	1	9	7	A0A384MTT2	0	2805.31	High	0.002101	1.359e-05	5.99
	FALSE	High	DEAGHFLWPGFGENAR		0.000175991	0.0080834	1	4	17	A0A384MTT2	0	1802.82	High	0.002101	7.776e-05	4.68
	FALSE	High	DEGWLAEHMLILGITSPAGK		0.000133442	0.0080834	1	6	8	A0A384MTT2	0	2138.1	High	0.002101	5.914e-05	5.58
	FALSE	High	DEGWLAEHMLILGITSPAGK	1xOxidation [M9]	0.00552528	0.0080834	1	6	3	A0A384MTT2	0	2154.09	High	0.002101	0.002419	3.26
	FALSE	High	DEGWLAEHMLILGITSPAGKK		1.24761e-05	0.0080834	1	6	1	A0A384MTT2	1	2266.19	High	0.002101	5.553e-06	6.88
	FALSE	High	DFVEHSAR		0.245854	0.0080834	1	5	5	A0A384MTT2	0	960.453	High	0.002101	0.1146	2.39
	FALSE	High	DFWEQEVR		0.163416	0.0080834	1	5	1	A0A384MTT2	0	1108.51	High	0.002101	0.073	1.34
	FALSE	High	DTVPLPPGGAR		0.152248	0.0080834	1	3	12	A0A384MTT2	0	1079.58	High	0.002101	0.06781	2.22
	FALSE	High	EGALDLSGLR		0.0592355	0.0080834	1	5	27	A0A384MTT2	0	1030.55	High	0.002101	0.02562	2.36
	FALSE	High	EIISFGSGYGGNSLLGK		0.000308778	0.0080834	2	9	14	P35558; A0A384MTT2	0	1698.87	High	0.002101	0.0001362	3.89
	FALSE	High	EIISFGSGYGGNSLLGKK		0.000197788	0.0080834	2	9	1	P35558; A0A384MTT2	1	1826.96	High	0.002101	8.737e-05	4.73
	FALSE	High	ETPIGLVPK		0.164699	0.0080834	1	5	1	A0A384MTT2	0	953.567	High	0.002101	0.07356	2.07
	FALSE	High	ETPIGLVPKEGALDLSGLR		0.0770949	0.0080834	1	5	1	A0A384MTT2	1	1965.1	High	0.002101	0.03348	3.58
	FALSE	High	EVLAELEALER		0.0106157	0.0080834	1	5	21	A0A384MTT2	0	1271.68	High	0.002101	0.004624	3.31
	FALSE	High	FCAPARQCPIMDPAWEAPEGVPIDAIIFGGR	2xCarbamidomethyl [C2; C8]; 1xOxidation [M11]	0.286719	0.0080834	1	7	1	A0A384MTT2	1	3457.65	High	0.002101	0.1373	2.24
	FALSE	High	FPGCMQGR	1xCarbamidomethyl [C4]	0.306324	0.0080834	1	8	1	A0A384MTT2	0	952.413	High	0.002101	0.1483	1.72
	FALSE	High	GQLGNWMSPADFQR		0.00151634	0.0080834	1	5	6	A0A384MTT2	0	1606.74	High	0.002101	0.0006654	4.23
	FALSE	High	GQLGNWMSPADFQR	1xOxidation [M7]	0.00150979	0.0080834	1	5	6	A0A384MTT2	0	1622.74	High	0.002101	0.0006635	3
	FALSE	High	GVPLVYEAFNWR		0.00394331	0.0080834	1	5	11	A0A384MTT2	0	1450.75	High	0.002101	0.001727	2.86
	FALSE	High	HGVFVGSAMR		0.063425	0.0080834	1	5	4	A0A384MTT2	0	1060.54	High	0.002101	0.02747	3.01
	FALSE	High	HGVFVGSAMR	1xOxidation [M9]	0.0874519	0.0080834	1	5	13	A0A384MTT2	0	1076.53	High	0.002101	0.03807	2.15
	FALSE	High	KLPKYNNCWLAR	1xCarbamidomethyl [C8]	0.0723578	0.0080834	1	5	1	A0A384MTT2	2	1562.83	High	0.002101	0.03135	2.67
	FALSE	High	LARDEGWLAEHMLILGITSPAGK		1.42073e-06	0.0080834	1	6	7	A0A384MTT2	1	2478.32	High	0.00210084	6.37531e-07	7.63
	FALSE	High	LARDEGWLAEHMLILGITSPAGK	1xOxidation [M12]	0.000162109	0.0080834	1	6	7	A0A384MTT2	1	2494.31	High	0.002101	7.176e-05	6.07
	FALSE	High	LARDEGWLAEHMLILGITSPAGKK		0.0124578	0.0080834	1	6	1	A0A384MTT2	2	2606.41	High	0.002101	0.005421	4.94
	FALSE	High	LCQPEGIHICDGTEAENTATLTLLEQQGLIR	2xCarbamidomethyl [C2; C10]	1.52881e-05	0.0080834	1	5	25	A0A384MTT2	0	3480.71	High	0.002101	6.807e-06	5.98
	FALSE	High	LCQPEGIHICDGTEAENTATLTLLEQQGLIRK	2xCarbamidomethyl [C2; C10]	0.00550144	0.0080834	1	5	1	A0A384MTT2	1	3608.8	High	0.002101	0.002404	4.83
	FALSE	High	LEGEDSARETPIGLVPK		0.291786	0.0080834	1	5	1	A0A384MTT2	1	1810.95	High	0.002101	0.1399	2.13
	FALSE	High	IFHVNWFR		0.186423	0.0080834	2	6	9	P35558; A0A384MTT2	0	1118.59	High	0.002101	0.08443	2.31
	FALSE	High	LGTPVLQALGDGDFVK		0.000512138	0.0080834	1	9	21	A0A384MTT2	0	1629.88	High	0.002101	0.0002258	4.6
	FALSE	High	IGVQLTDSAYVVASMR		8.51072e-05	0.0080834	1	9	29	A0A384MTT2	0	1709.89	High	0.002101	3.774e-05	5.17
	FALSE	High	IGVQLTDSAYVVASMR	1xOxidation [M15]	0.165344	0.0080834	1	9	2	A0A384MTT2	0	1725.88	High	0.002101	0.07384	2.69
	FALSE	High	LNWHGLSPLGWPSCR	1xCarbamidomethyl [C14]	0.000624857	0.0080834	1	5	18	A0A384MTT2	0	1779.87	High	0.002101	0.0002754	4.57
	FALSE	High	QCPIMDPAWEAPEGVPIDAIIFGGR	1xCarbamidomethyl [C2]	0.00011032	0.0080834	1	7	5	A0A384MTT2	0	2739.33	High	0.002101	4.888e-05	4.9
	FALSE	High	QCPIMDPAWEAPEGVPIDAIIFGGR	1xCarbamidomethyl [C2]; 1xOxidation [M5]	2.3867e-05	0.0080834	1	7	7	A0A384MTT2	0	2755.32	High	0.002101	1.061e-05	4.66
	FALSE	High	RDEAGHFLWPGFGENAR		0.0033748	0.0080834	1	4	2	A0A384MTT2	1	1958.93	High	0.002101	0.00148	4.4
	FALSE	High	RLEGEDSAR		0.287727	0.0080834	1	5	2	A0A384MTT2	1	1032.51	High	0.002101	0.1378	2.81
	FALSE	High	RYVAAAFPSACGK	1xCarbamidomethyl [C11]	0.00377641	0.0080834	1	6	2	A0A384MTT2	1	1397.7	High	0.002101	0.001652	4.96
	FALSE	High	SYLTEQVNQDLPK		0.00260352	0.0080834	1	5	16	A0A384MTT2	0	1534.77	High	0.002101	0.001141	3.92
	FALSE	High	SYLTEQVNQDLPKEVLAELEALER		7.36122e-06	0.0080834	1	5	2	A0A384MTT2	1	2787.44	High	0.002101	3.283e-06	7.23
	FALSE	High	SYLTEQVNQDLPKEVLAELEALERR		0.000473785	0.0080834	1	5	1	A0A384MTT2	2	2943.54	High	0.002101	0.0002092	5.2
	FALSE	High	TDPKDVARVESK		0.184289	0.0080834	1	5	1	A0A384MTT2	2	1344.71	High	0.002101	0.08331	2.69
	FALSE	High	TLIGHVPDQR		0.0180701	0.0080834	1	8	13	A0A384MTT2	0	1135.62	High	0.002101	0.007864	2.86
	FALSE	High	TLIGHVPDQREIISFGSGYGGNSLLGK		5.92985e-06	0.0080834	1	7	3	A0A384MTT2	1	2815.47	High	0.002101	2.65e-06	5.43
	FALSE	High	TMYVLPFSMGPVGSPLSR		0.00248257	0.0080834	1	8	2	A0A384MTT2	0	1938.98	High	0.002101	0.001089	5.44
	FALSE	High	TMYVLPFSMGPVGSPLSR	1xOxidation [M]	0.00213387	0.0080834	1	8	2	A0A384MTT2	0	1954.98	High	0.002101	0.0009379	3.65
	FALSE	High	TNLAMMRPALPGWK		0.00587013	0.0080834	1	6	2	A0A384MTT2	0	1585.83	High	0.002101	0.002569	5.08
	FALSE	High	TNLAMMRPALPGWK	1xOxidation [M]	0.0262107	0.0080834	1	6	2	A0A384MTT2	0	1601.83	High	0.002101	0.01137	3.3
	FALSE	High	TNLAMMRPALPGWKVECVGDDIAWMR	1xCarbamidomethyl [C17]	2.66435e-06	0.0080834	1	6	1	A0A384MTT2	1	3017.46	High	0.002101	1.193e-06	7.05
	FALSE	High	TVIVTPSQR		0.0477912	0.0080834	1	5	10	A0A384MTT2	0	1000.58	High	0.002101	0.02065	2.28
	FALSE	High	TVIVTPSQRDTVPLPPGGAR		0.115843	0.0080834	1	3	1	A0A384MTT2	1	2061.15	High	0.002101	0.05081	2.93
	FALSE	High	VECVGDDIAWMR	1xCarbamidomethyl [C3]	0.00288826	0.0080834	1	6	3	A0A384MTT2	0	1450.65	High	0.002101	0.001264	3.27
	FALSE	High	VECVGDDIAWMR	1xCarbamidomethyl [C3]; 1xOxidation [M11]	0.0161484	0.0080834	1	6	11	A0A384MTT2	0	1466.64	High	0.002101	0.007038	2.53
	FALSE	High	VESKTVIVTPSQR		0.0999084	0.0080834	1	5	3	A0A384MTT2	1	1443.82	High	0.002101	0.04349	2.17
	FALSE	High	VLDWICR	1xCarbamidomethyl [C6]	0.204247	0.0080834	1	5	7	A0A384MTT2	0	961.492	High	0.002101	0.09321	1.9
	FALSE	High	VLSGDLGQLPTGIR		0.000167815	0.0080834	1	5	28	A0A384MTT2	0	1425.81	High	0.002101	7.427e-05	4.02
	FALSE	High	VLSGDLGQLPTGIRDFVEHSAR		0.000296991	0.0080834	1	5	6	A0A384MTT2	1	2367.24	High	0.002101	0.0001309	4.56
	FALSE	High	YNNCWLAR	1xCarbamidomethyl [C4]	0.273856	0.0080834	1	5	3	A0A384MTT2	0	1096.5	High	0.002101	0.1301	2.34
	FALSE	High	YVAAAFPSACGK	1xCarbamidomethyl [C10]	0.00567052	0.0080834	1	6	12	A0A384MTT2	0	1241.6	High	0.002101	0.002479	3.19
FALSE	Master Protein	P35558	Phosphoenolpyruvate carboxykinase, cytosolic [GTP] OS=Homo sapiens OX=9606 GN=PCK1 PE=1 SV=3	6	4	25	1	622	69.2	6.14	65.94	4	1
	Checked	Confidence	Sequence	Modifications	Qvality PEP	Qvality q-value	# Protein Groups	# Proteins	# PSMs	Master Protein Accessions	# Missed Cleavages	Theo. MH+ [Da]	Confidence (by Search Engine): Sequest HT	Percolator q-Value (by Search Engine): Sequest HT	Percolator PEP (by Search Engine): Sequest HT	XCorr (by Search Engine): Sequest HT
	FALSE	High	EIISFGSGYGGNSLLGK		0.000308778	0.0080834	2	9	14	P35558; A0A384MTT2	0	1698.87	High	0.002101	0.0001362	3.89
	FALSE	High	EIISFGSGYGGNSLLGKK		0.000197788	0.0080834	2	9	1	P35558; A0A384MTT2	1	1826.96	High	0.002101	8.737e-05	4.73
	FALSE	High	IFHVNWFR		0.186423	0.0080834	2	6	9	P35558; A0A384MTT2	0	1118.59	High	0.002101	0.08443	2.31
	FALSE	High	YLAAAFPSACGK	1xCarbamidomethyl [C10]	0.0238319	0.0080834	1	2	1	P35558	0	1255.61	High	0.002101	0.01038	2.37
FALSE	Master Protein	A0A679KTH4	Beta-galactosidase (Fragment) OS=Homo sapiens OX=9606 GN=EmGFP-LacZ-E2F-TdTom PE=3 SV=1	11	12	13	12	1279	145.4	5.81	41.72	12	1
	Checked	Confidence	Sequence	Modifications	Qvality PEP	Qvality q-value	# Protein Groups	# Proteins	# PSMs	Master Protein Accessions	# Missed Cleavages	Theo. MH+ [Da]	Confidence (by Search Engine): Sequest HT	Percolator q-Value (by Search Engine): Sequest HT	Percolator PEP (by Search Engine): Sequest HT	XCorr (by Search Engine): Sequest HT
	FALSE	High	AEVKFEGDTLVNR		0.0442229	0.0080834	1	1	1	A0A679KTH4	1	1477.76	High	0.002101	0.01911	2.67
	FALSE	High	APLDNDIGVSEATR		0.000414342	0.0080834	1	1	1	A0A679KTH4	0	1457.72	High	0.002101	0.0001829	3.47
	FALSE	High	DWENPGVTQLNR		0.0942707	0.0080834	1	1	1	A0A679KTH4	0	1428.69	High	0.002101	0.04102	3.42
	FALSE	High	GIDFKEDGNILGHK		0.0163592	0.0080834	1	1	2	A0A679KTH4	1	1542.79	High	0.002101	0.007107	4.06
	FALSE	High	HQQQFFQFR		0.209702	0.0080834	1	1	1	A0A679KTH4	0	1265.62	High	0.002101	0.09577	2.47
	FALSE	High	IDPNAWVER		0.148087	0.0080834	1	1	1	A0A679KTH4	0	1099.55	High	0.002101	0.06581	2.58
	FALSE	High	IGLNCQLAQVAER	1xCarbamidomethyl [C5]	0.0121387	0.0080834	1	1	1	A0A679KTH4	0	1471.77	High	0.002101	0.00529	3.88
	FALSE	High	LWSAEIPNLYR		0.0582303	0.0080834	1	1	1	A0A679KTH4	0	1361.72	High	0.002101	0.02521	3.24
	FALSE	High	NHPSVIIWSLGNESGHGANHDALYR		0.000412554	0.0080834	1	1	1	A0A679KTH4	0	2744.33	High	0.002101	0.000182	4.39
	FALSE	High	SAMPEGYVQER	1xOxidation [M3]	0.234437	0.0080834	1	1	1	A0A679KTH4	0	1282.57	High	0.002101	0.1086	2.46
	FALSE	High	TRAEVKFEGDTLVNR		0.0325375	0.0080834	1	1	1	A0A679KTH4	2	1734.91	High	0.002101	0.01409	3.66
	FALSE	High	VDEDQPFPAVPK		0.0492536	0.0080834	1	1	1	A0A679KTH4	0	1341.67	High	0.002101	0.02133	2.85
FALSE	Master Protein	H6VRG2	Cytokeratin-1 OS=Homo sapiens OX=9606 GN=KRT1 PE=3 SV=1	17	10	10	9	644	66	8.12	29.88	10	1
	Checked	Confidence	Sequence	Modifications	Qvality PEP	Qvality q-value	# Protein Groups	# Proteins	# PSMs	Master Protein Accessions	# Missed Cleavages	Theo. MH+ [Da]	Confidence (by Search Engine): Sequest HT	Percolator q-Value (by Search Engine): Sequest HT	Percolator PEP (by Search Engine): Sequest HT	XCorr (by Search Engine): Sequest HT
	FALSE	High	AEAESLYQSK		0.081777	0.0080834	1	7	1	H6VRG2	0	1125.54	High	0.002101	0.03547	2.51
	FALSE	High	FSSCGGGGGSFGAGGGFGSR	1xCarbamidomethyl [C4]	5.66791e-05	0.0080834	1	6	1	H6VRG2	0	1765.73	High	0.002101	2.515e-05	4.73
	FALSE	High	LALDLEIATYR		0.014431	0.0080834	1	7	1	H6VRG2	0	1277.71	High	0.002101	0.006291	3.19
	FALSE	High	NLDLDSIIAEVK		0.0376909	0.0080834	2	19	1	P35908; H6VRG2	0	1329.73	High	0.002101	0.01634	2.67
	FALSE	High	SKAEAESLYQSK		0.0118791	0.0080834	1	7	1	H6VRG2	1	1340.67	High	0.002101	0.005183	3.14
	FALSE	High	SLNNQFASFIDK		0.122634	0.0080834	1	7	1	H6VRG2	0	1383.69	High	0.002101	0.05393	2.52
	FALSE	High	SLVNLGGSK		0.141183	0.0080834	1	6	1	H6VRG2	0	874.499	High	0.002101	0.06256	2.03
	FALSE	High	TLLEGEESR		0.26521	0.0080834	1	7	1	H6VRG2	0	1033.52	High	0.002101	0.1253	2.7
	FALSE	High	WELLQQVDTSTR		0.0116753	0.0080834	1	7	1	H6VRG2	0	1475.75	High	0.002101	0.005102	3.31
	FALSE	High	YEELQITAGR		0.0380182	0.0080834	1	8	1	H6VRG2	0	1179.6	High	0.002101	0.01651	3.09
FALSE	Master Protein	Q16186	Proteasomal ubiquitin receptor ADRM1 OS=Homo sapiens OX=9606 GN=ADRM1 PE=1 SV=2	18	5	6	5	407	42.1	5.07	23.41	5	1
	Checked	Confidence	Sequence	Modifications	Qvality PEP	Qvality q-value	# Protein Groups	# Proteins	# PSMs	Master Protein Accessions	# Missed Cleavages	Theo. MH+ [Da]	Confidence (by Search Engine): Sequest HT	Percolator q-Value (by Search Engine): Sequest HT	Percolator PEP (by Search Engine): Sequest HT	XCorr (by Search Engine): Sequest HT
	FALSE	High	GASNKYLVEFR		0.0444141	0.0080834	1	5	1	Q16186	1	1283.67	High	0.002101	0.01924	2.83
	FALSE	High	GLVYIQQTDDSLIHFCWK	1xCarbamidomethyl [C16]	0.0232215	0.0080834	1	5	1	Q16186	0	2223.09	High	0.002101	0.01008	3.75
	FALSE	High	LFFWMQEPK		0.176639	0.0080834	1	2	1	Q16186	0	1225.61	High	0.002101	0.07938	2.28
	FALSE	High	SQSAAVTPSSTTSSTR		0.00131467	0.0080834	1	3	1	Q16186	0	1567.76	High	0.002101	0.0005764	4.27
	FALSE	High	TSGNVEDDLIIFPDDCEFKR	1xCarbamidomethyl [C16]	0.000288136	0.0080834	1	3	2	Q16186	1	2370.09	High	0.002101	0.000127	6.01
FALSE	Master Protein	A0A1B0GVI3	Keratin, type I cytoskeletal 10 OS=Homo sapiens OX=9606 GN=KRT10 PE=1 SV=2	12	5	7	5	624	63.3	5.26	19.73	5	1
	Checked	Confidence	Sequence	Modifications	Qvality PEP	Qvality q-value	# Protein Groups	# Proteins	# PSMs	Master Protein Accessions	# Missed Cleavages	Theo. MH+ [Da]	Confidence (by Search Engine): Sequest HT	Percolator q-Value (by Search Engine): Sequest HT	Percolator PEP (by Search Engine): Sequest HT	XCorr (by Search Engine): Sequest HT
	FALSE	High	ALEESNYELEGK		0.0885558	0.0080834	1	2	1	A0A1B0GVI3	0	1381.65	High	0.002101	0.03847	1.92
	FALSE	High	QSLEASLAETEGR		0.0200463	0.0080834	1	2	3	A0A1B0GVI3	0	1390.68	High	0.002101	0.008709	3.1
	FALSE	High	SLLEGEGSSGGGGR		0.0393558	0.0080834	1	2	1	A0A1B0GVI3	0	1262.6	High	0.002101	0.01706	3.16
	FALSE	High	SQYEQLAEQNR		0.0565105	0.0080834	1	2	1	A0A1B0GVI3	0	1365.64	High	0.002101	0.02442	3.14
	FALSE	High	TIDDLKNQILNLTTDNANILLQIDNAR		0.0143068	0.0080834	1	2	1	A0A1B0GVI3	1	3052.63	High	0.002101	0.006223	2.79
FALSE	Master Protein	Q8TCX0	Delta 2-isopentenyl pyrophosphate transferase-like protein (Fragment) OS=Homo sapiens OX=9606 PE=2 SV=1	65	5	5	5	48	5.5	9.54	17.67	5	1
	Checked	Confidence	Sequence	Modifications	Qvality PEP	Qvality q-value	# Protein Groups	# Proteins	# PSMs	Master Protein Accessions	# Missed Cleavages	Theo. MH+ [Da]	Confidence (by Search Engine): Sequest HT	Percolator q-Value (by Search Engine): Sequest HT	Percolator PEP (by Search Engine): Sequest HT	XCorr (by Search Engine): Sequest HT
	FALSE	High	ERVPVSIYLVNGIK		0.00186615	0.0080834	1	1	1	Q8TCX0	1	1586.93	High	0.002101	0.0008176	4.88
	FALSE	High	GQSLQDPFLNALR		0.036096	0.0080834	1	1	1	Q8TCX0	0	1458.77	High	0.002101	0.01568	3.51
	FALSE	High	GQSLQDPFLNALRR		0.0150688	0.0080834	1	1	1	Q8TCX0	1	1614.87	High	0.002101	0.006563	3.23
	FALSE	High	MAKGQSLQDPFLNALRR	1xMet-loss [N-Term]	0.249453	0.0080834	1	1	1	Q8TCX0	2	1814	High	0.002101	0.1167	3.05
	FALSE	High	VPVSIYLVNGIK		0.0600003	0.0080834	1	1	1	Q8TCX0	0	1301.78	High	0.002101	0.02592	3.01
FALSE	Master Protein	P35527	Keratin, type I cytoskeletal 9 OS=Homo sapiens OX=9606 GN=KRT9 PE=1 SV=3	13	6	6	6	623	62	5.24	15.33	6	1
	Checked	Confidence	Sequence	Modifications	Qvality PEP	Qvality q-value	# Protein Groups	# Proteins	# PSMs	Master Protein Accessions	# Missed Cleavages	Theo. MH+ [Da]	Confidence (by Search Engine): Sequest HT	Percolator q-Value (by Search Engine): Sequest HT	Percolator PEP (by Search Engine): Sequest HT	XCorr (by Search Engine): Sequest HT
	FALSE	High	FSSSSGYGGGSSR		0.263317	0.0080834	1	1	1	P35527	0	1235.53	High	0.002101	0.1244	2.8
	FALSE	High	GGSGGSYGGGGSGGGYGGGSGSR		0.0179921	0.0080834	1	2	1	P35527	0	1791.73	High	0.002101	0.007843	2.4
	FALSE	High	QEYEQLIAK		0.239653	0.0080834	1	2	1	P35527	0	1121.58	High	0.002101	0.1116	2.42
	FALSE	High	QGVDADINGLR		0.135646	0.0080834	1	2	1	P35527	0	1157.59	High	0.002101	0.05989	2.91
	FALSE	High	QVLDNLTMEK	1xOxidation [M8]	0.317027	0.0080834	1	2	1	P35527	0	1206.6	High	0.002101	0.1543	1.76
	FALSE	High	VQALEEANNDLENK		0.0208419	0.0080834	1	1	1	P35527	0	1586.77	High	0.002101	0.009059	3.04
FALSE	Master Protein	P35908	Keratin, type II cytoskeletal 2 epidermal OS=Homo sapiens OX=9606 GN=KRT2 PE=1 SV=2	9	5	5	4	639	65.4	8	10.31	5	1
	Checked	Confidence	Sequence	Modifications	Qvality PEP	Qvality q-value	# Protein Groups	# Proteins	# PSMs	Master Protein Accessions	# Missed Cleavages	Theo. MH+ [Da]	Confidence (by Search Engine): Sequest HT	Percolator q-Value (by Search Engine): Sequest HT	Percolator PEP (by Search Engine): Sequest HT	XCorr (by Search Engine): Sequest HT
	FALSE	High	GFSSGSAVVSGGSR		0.0344191	0.0080834	1	1	1	P35908	0	1254.61	High	0.002101	0.01491	1.44
	FALSE	High	NLDLDSIIAEVK		0.0376909	0.0080834	2	19	1	P35908; H6VRG2	0	1329.73	High	0.002101	0.01634	2.67
	FALSE	High	NVQDAIADAEQR		0.1686	0.0080834	1	1	1	P35908	0	1329.64	High	0.002101	0.07541	2.15
	FALSE	High	VDLLNQEIEFLK		0.0221427	0.0080834	1	1	1	P35908	0	1460.8	High	0.002101	0.009607	3.53
	FALSE	High	YEELQVTVGR		0.209702	0.0080834	1	1	1	P35908	0	1193.62	High	0.002101	0.09587	1.96
FALSE	Master Protein	B2RBS8	cDNA, FLJ95666, highly similar to Homo sapiens albumin (ALB), mRNA OS=Homo sapiens OX=9606 PE=2 SV=1	4	2	2	2	609	69.3	6.28	5.18	2	1
	Checked	Confidence	Sequence	Modifications	Qvality PEP	Qvality q-value	# Protein Groups	# Proteins	# PSMs	Master Protein Accessions	# Missed Cleavages	Theo. MH+ [Da]	Confidence (by Search Engine): Sequest HT	Percolator q-Value (by Search Engine): Sequest HT	Percolator PEP (by Search Engine): Sequest HT	XCorr (by Search Engine): Sequest HT
	FALSE	High	KVPQVSTPTLVEVSR		0.066751	0.0080834	1	13	1	B2RBS8	1	1639.94	High	0.002101	0.02896	3.21
	FALSE	High	YICENQDSISSK	1xCarbamidomethyl [C3]	0.315945	0.0080834	1	12	1	B2RBS8	0	1443.64	High	0.002101	0.1536	1.98
FALSE	Master Protein	E9PLF4	Heat shock cognate 71 kDa protein (Fragment) OS=Homo sapiens OX=9606 GN=HSPA8 PE=1 SV=1	9	1	1	1	187	20.4	7.33	4.09	1	1
	Checked	Confidence	Sequence	Modifications	Qvality PEP	Qvality q-value	# Protein Groups	# Proteins	# PSMs	Master Protein Accessions	# Missed Cleavages	Theo. MH+ [Da]	Confidence (by Search Engine): Sequest HT	Percolator q-Value (by Search Engine): Sequest HT	Percolator PEP (by Search Engine): Sequest HT	XCorr (by Search Engine): Sequest HT
	FALSE	High	IINEPTAAAIAYGLDK		0.0224319	0.0080834	1	23	1	E9PLF4	0	1659.9	High	0.002101	0.009752	4.09
FALSE	Master Protein	Q53ZX8	Protease serine 1 (Fragment) OS=Homo sapiens OX=9606 GN=PRSS1 PE=4 SV=1	24	1	1	1	84	9.1	9.47	3.88	1	1
	Checked	Confidence	Sequence	Modifications	Qvality PEP	Qvality q-value	# Protein Groups	# Proteins	# PSMs	Master Protein Accessions	# Missed Cleavages	Theo. MH+ [Da]	Confidence (by Search Engine): Sequest HT	Percolator q-Value (by Search Engine): Sequest HT	Percolator PEP (by Search Engine): Sequest HT	XCorr (by Search Engine): Sequest HT
	FALSE	High	LGEHNIEVLEGNEQFINAAK		0.0043557	0.0080834	1	17	1	Q53ZX8	0	2225.12	High	0.002101	0.00191	3.88
FALSE	Master Protein	Q7Z7M3	Interleukin-2 OS=Homo sapiens OX=9606 GN=IL2 PE=2 SV=1	11	1	1	1	133	15.5	8.43	3.33	1	1
	Checked	Confidence	Sequence	Modifications	Qvality PEP	Qvality q-value	# Protein Groups	# Proteins	# PSMs	Master Protein Accessions	# Missed Cleavages	Theo. MH+ [Da]	Confidence (by Search Engine): Sequest HT	Percolator q-Value (by Search Engine): Sequest HT	Percolator PEP (by Search Engine): Sequest HT	XCorr (by Search Engine): Sequest HT
	FALSE	High	DLISNINVIVLELK		0.00350874	0.0080834	1	9	1	Q7Z7M3	0	1582.94	High	0.002101	0.001537	3.33
FALSE	Master Protein	A8K6Q8	Transferrin receptor protein 1 OS=Homo sapiens OX=9606 PE=2 SV=1	2	1	1	1	760	84.8	6.61	3.08	1	1
	Checked	Confidence	Sequence	Modifications	Qvality PEP	Qvality q-value	# Protein Groups	# Proteins	# PSMs	Master Protein Accessions	# Missed Cleavages	Theo. MH+ [Da]	Confidence (by Search Engine): Sequest HT	Percolator q-Value (by Search Engine): Sequest HT	Percolator PEP (by Search Engine): Sequest HT	XCorr (by Search Engine): Sequest HT
	FALSE	High	LAVDEEENADNNTK		0.000730118	0.0080834	1	3	1	A8K6Q8	0	1561.7	High	0.002101	0.000321	3.08
FALSE	Master Protein	B3KVF5	cDNA FLJ16494 fis, clone CTONG3004576, highly similar to Keratin, type I cytoskeletal 15 OS=Homo sapiens OX=9606 PE=2 SV=1	3	1	2	1	456	49.1	4.79	2.71	1	1
	Checked	Confidence	Sequence	Modifications	Qvality PEP	Qvality q-value	# Protein Groups	# Proteins	# PSMs	Master Protein Accessions	# Missed Cleavages	Theo. MH+ [Da]	Confidence (by Search Engine): Sequest HT	Percolator q-Value (by Search Engine): Sequest HT	Percolator PEP (by Search Engine): Sequest HT	XCorr (by Search Engine): Sequest HT
	FALSE	High	ALEEANADLEVK		0.0270162	0.0080834	1	13	2	B3KVF5	0	1301.66	High	0.002101	0.01173	2.71
FALSE	Master Protein	A0A1B0GVC3	GTP-binding protein Di-Ras2 (Fragment) OS=Homo sapiens OX=9606 GN=DIRAS2 PE=1 SV=1	10	1	1	1	112	12.5	6.52	2.65	1	1
	Checked	Confidence	Sequence	Modifications	Qvality PEP	Qvality q-value	# Protein Groups	# Proteins	# PSMs	Master Protein Accessions	# Missed Cleavages	Theo. MH+ [Da]	Confidence (by Search Engine): Sequest HT	Percolator q-Value (by Search Engine): Sequest HT	Percolator PEP (by Search Engine): Sequest HT	XCorr (by Search Engine): Sequest HT
	FALSE	High	VAVFGAGGVGK		0.194425	0.0080834	1	3	1	A0A1B0GVC3	0	961.547	High	0.002101	0.08831	2.65
FALSE	Master Protein	O14556	Glyceraldehyde-3-phosphate dehydrogenase, testis-specific OS=Homo sapiens OX=9606 GN=GAPDHS PE=1 SV=2	3	1	1	1	408	44.5	8.19	2.54	1	1
	Checked	Confidence	Sequence	Modifications	Qvality PEP	Qvality q-value	# Protein Groups	# Proteins	# PSMs	Master Protein Accessions	# Missed Cleavages	Theo. MH+ [Da]	Confidence (by Search Engine): Sequest HT	Percolator q-Value (by Search Engine): Sequest HT	Percolator PEP (by Search Engine): Sequest HT	XCorr (by Search Engine): Sequest HT
	FALSE	High	AGIALNDNFVK		0.145175	0.0080834	1	1	1	O14556	0	1161.63	High	0.002101	0.06433	2.54
FALSE	Master Protein	F8WAN9	GMP reductase OS=Homo sapiens OX=9606 GN=GMPR2 PE=1 SV=1	3	1	1	1	349	38.2	8.47	2.37	1	1
	Checked	Confidence	Sequence	Modifications	Qvality PEP	Qvality q-value	# Protein Groups	# Proteins	# PSMs	Master Protein Accessions	# Missed Cleavages	Theo. MH+ [Da]	Confidence (by Search Engine): Sequest HT	Percolator q-Value (by Search Engine): Sequest HT	Percolator PEP (by Search Engine): Sequest HT	XCorr (by Search Engine): Sequest HT
	FALSE	High	VGIGPGSVCTTR	1xCarbamidomethyl [C9]	0.225945	0.0080834	1	12	1	F8WAN9	0	1203.62	High	0.002101	0.1043	2.37
FALSE	Master Protein	P57075	Ubiquitin-associated and SH3 domain-containing protein A OS=Homo sapiens OX=9606 GN=UBASH3A PE=1 SV=1	2	1	1	1	661	74.1	7.66	2.16	1	1
	Checked	Confidence	Sequence	Modifications	Qvality PEP	Qvality q-value	# Protein Groups	# Proteins	# PSMs	Master Protein Accessions	# Missed Cleavages	Theo. MH+ [Da]	Confidence (by Search Engine): Sequest HT	Percolator q-Value (by Search Engine): Sequest HT	Percolator PEP (by Search Engine): Sequest HT	XCorr (by Search Engine): Sequest HT
	FALSE	High	IAGDALLDSGIR		0.322479	0.0080834	1	2	1	P57075	0	1200.66	High	0.002101	0.1576	2.16
FALSE	Master Protein	Q13423	NAD(P) transhydrogenase, mitochondrial OS=Homo sapiens OX=9606 GN=NNT PE=1 SV=3	1	1	1	1	1086	113.8	8.09	2.14	1	1
	Checked	Confidence	Sequence	Modifications	Qvality PEP	Qvality q-value	# Protein Groups	# Proteins	# PSMs	Master Protein Accessions	# Missed Cleavages	Theo. MH+ [Da]	Confidence (by Search Engine): Sequest HT	Percolator q-Value (by Search Engine): Sequest HT	Percolator PEP (by Search Engine): Sequest HT	XCorr (by Search Engine): Sequest HT
	FALSE	High	FFTGQITAAGK		0.0821214	0.0080834	1	6	1	Q13423	0	1140.6	High	0.002101	0.03567	2.14
FALSE	Master Protein	C9JM50	Keratin, type I cytoskeletal 19 (Fragment) OS=Homo sapiens OX=9606 GN=KRT19 PE=1 SV=1	5	1	1	1	196	20.8	5.43	1.97	1	1
	Checked	Confidence	Sequence	Modifications	Qvality PEP	Qvality q-value	# Protein Groups	# Proteins	# PSMs	Master Protein Accessions	# Missed Cleavages	Theo. MH+ [Da]	Confidence (by Search Engine): Sequest HT	Percolator q-Value (by Search Engine): Sequest HT	Percolator PEP (by Search Engine): Sequest HT	XCorr (by Search Engine): Sequest HT
	FALSE	High	IVLQIDNAR		0.204247	0.0080834	1	7	1	C9JM50	0	1041.61	High	0.002101	0.09309	1.97
